# Supplementary material
Source: PubMed Central journal article supplement (PMC6849335)
Supplement: ap9b00718_si_001.pdf [file ap9b00718_si_001.pdf]

## Electronic Supporting Information

### **Luminescent Solar Concentrators Based on Energy Transfer from an Aggregation-Induced Emitter Conjugated Polymer**

*Guanpeng Lyu,<sup>a</sup> James Kendall,<sup>a</sup> Ilaria Meazzini,<sup>a</sup> Eduard Preis,<sup>b</sup> Sebnem Bayseç,<sup>b</sup> Ullrich Scherf,<sup>b</sup> Sébastien Clément,<sup>c</sup> Rachel C Evans<sup>a\*</sup>*

<sup>a</sup>*Department of Material Science & Metallurgy, University of Cambridge, 27 Charles Babbage Road, Cambridge, CB3 0FS, U.K. Email: [rce@cam.ac.uk](mailto:rce@cam.ac.uk)*

<sup>b</sup>*Macromolecular Chemistry Group (buwmakro) and Institute for Polymer Technology, Bergische Universität Wuppertal, Gausss-Str. 20, D-42119 Wuppertal, Germany.*

<sup>c</sup>*Institut Charles Gerhardt Montpellier, ICGM, UMR 5253, CNRS, Université de Montpellier, ENSCM, Place Eugène Bataillon, 34095 Montpellier cedex 5, France.*

*\*Corresponding author: [rce26@cam.ac.uk](mailto:rce26@cam.ac.uk)*

## Table of Contents

|                                                                                              |    |
|----------------------------------------------------------------------------------------------|----|
| 1. Photoluminescence properties of dU(600) waveguides .....                                  | 3  |
| 2. Aggregation-induced emission (AIE) behaviour of p-O-TPE in THF/EtOH .....                 | 3  |
| 3. Steady-state photoluminescence studies of p-O-TPE-PDI-Sil energy transfer in dU(600)..... | 4  |
| 3.1 Excitation spectra .....                                                                 | 4  |
| 3.2 Emission spectra .....                                                                   | 4  |
| 3.3 Integrated photon counts of edge emission .....                                          | 7  |
| 4. UV/Vis transmittance and absorption spectra of large LSCs .....                           | 7  |
| 5. Literature comparison of LSC efficiencies.....                                            | 9  |
| 6. References .....                                                                          | 10 |

## 1. Photoluminescence properties of dU(600) waveguides

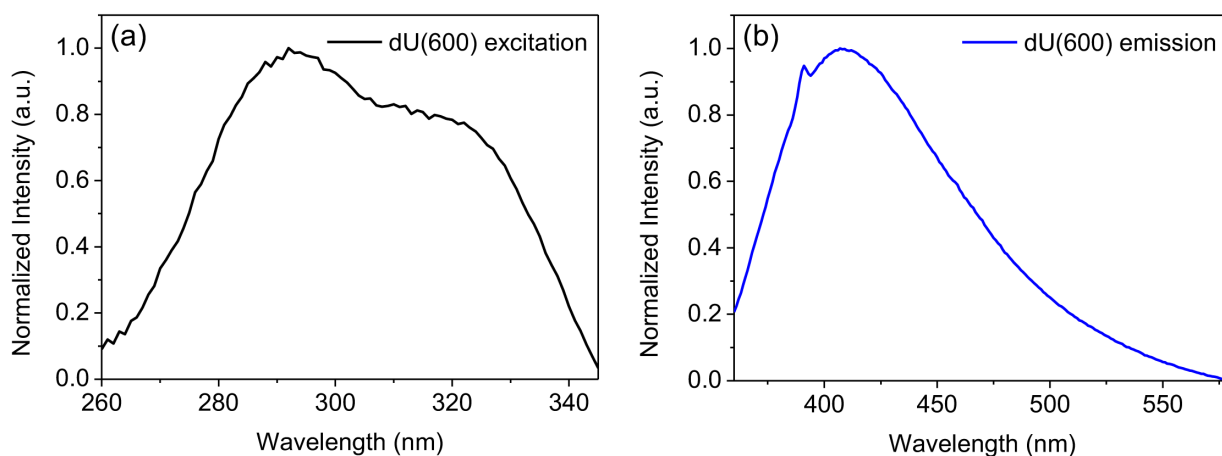

**Figure S1.** (a) Photoluminescence excitation ( $\lambda_{em} = 360$  nm) and (b) emission spectra ( $\lambda_{ex} = 350$  nm) of dU(600) waveguides.

## 2. Aggregation-induced emission (AIE) behaviour of p-O-TPE in THF/EtOH

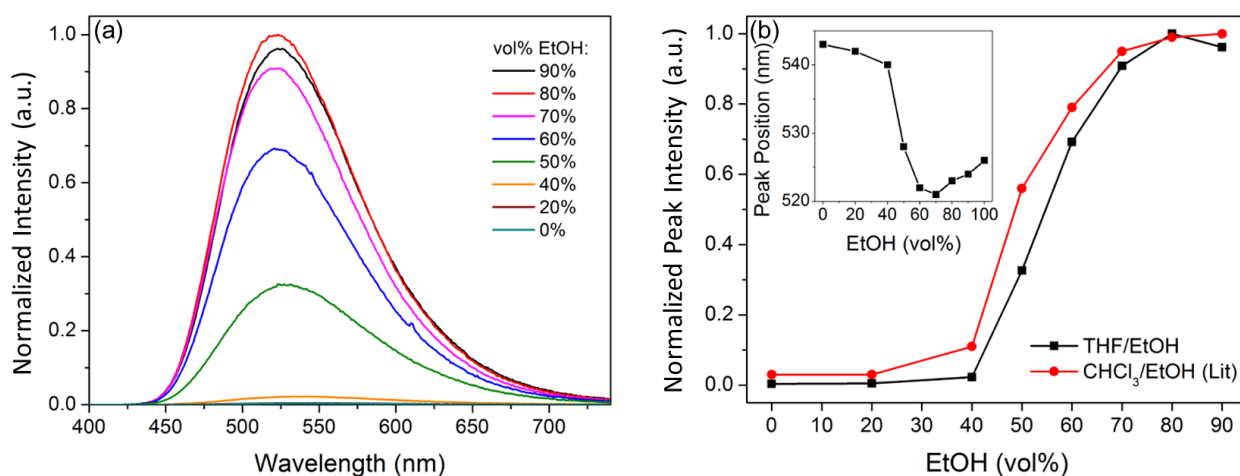

**Figure S2.** (a) Emission spectra ( $\lambda_{ex} = 373$  nm) of p-O-TPE in THF/EtOH solutions of varying EtOH concentration. (b) Variation of peak intensity of p-O-TPE emission ( $\lambda_{ex} = 373$  nm) in THF/EtOH (black) and CHCl<sub>3</sub>/EtOH (red)<sup>1</sup> with varying EtOH concentration. Inset: variation of peak position of p-O-TPE emission in THF/EtOH.

### 3. Steady-state photoluminescence studies of p-O-TPE-PDI-Sil energy transfer in dU(600)

#### 3.1 Excitation spectra

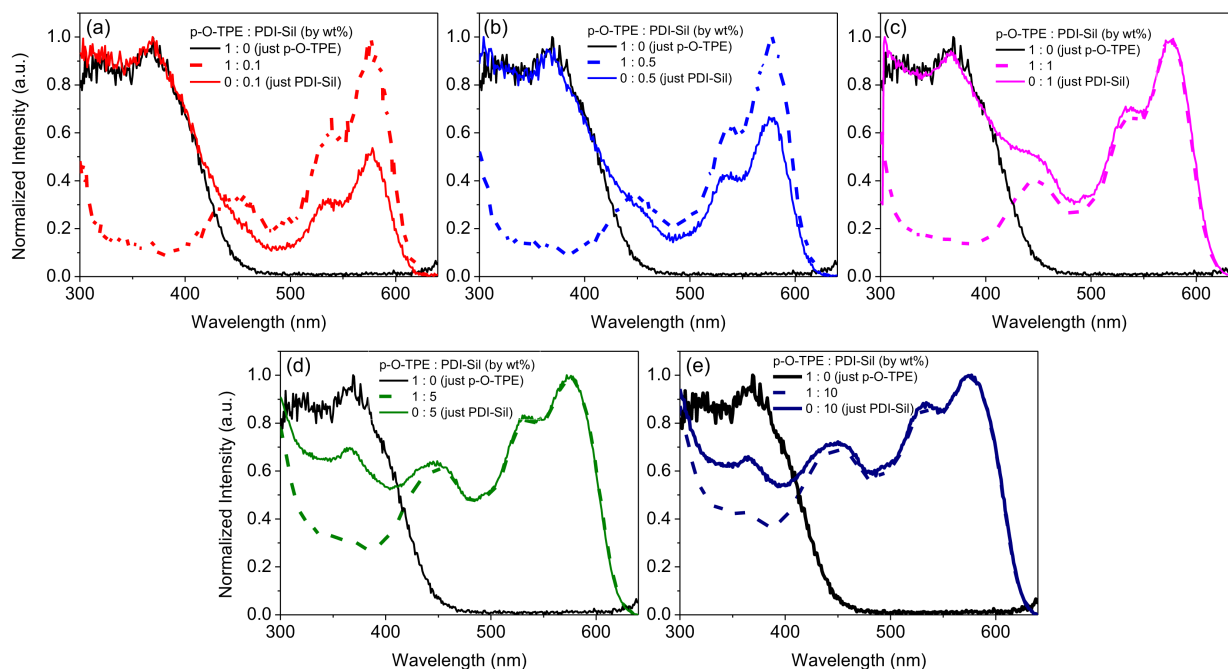

**Figure S3.** (a)-(e) Normalized excitation spectra ( $\lambda_{em} = 650$  nm) of p-O-TPE-dU(600) (solid black), p-O-TPE-PDI-Sil-dU(600) (solid coloured) and PDI-Sil-dU(600) (dash coloured) with varying concentration ratios between p-O-TPE and PDI-Sil. A concentration ratio of 1 : 1 represents 0.005 wt% of p-O-TPE and 0.005 wt% of PDI-Sil.

#### 3.2 Emission spectra

The enhancement in PDI-Sil emission as a result of FRET is calculated by comparing the PDI-Sil emission in p-O-TPE-PDI-Sil-dU(600) and PDI-Sil-dU(600) (Figure S4). Firstly, the p-O-TPE emission in p-O-TPE-dU(600) is normalized by the peak intensity of p-O-TPE emission in p-O-TPE-dU(600) (Figure S5). Subsequently, it is subtracted from the emission of p-O-TPE-PDI-Sil-dU(600) to get the emission of PDI-Sil in p-O-TPE-PDI-Sil-dU(600) and compared to the emission of PDI-Sil in PDI-Sil-dU(600) (Figure S6). The difference in integrated photon counts between the PDI-Sil emission in p-O-TPE-PDI-Sil-dU(600) and PDI-Sil-dU(600) corresponds to the increase in PDI-Sil emission due to FRET from p-O-TPE.

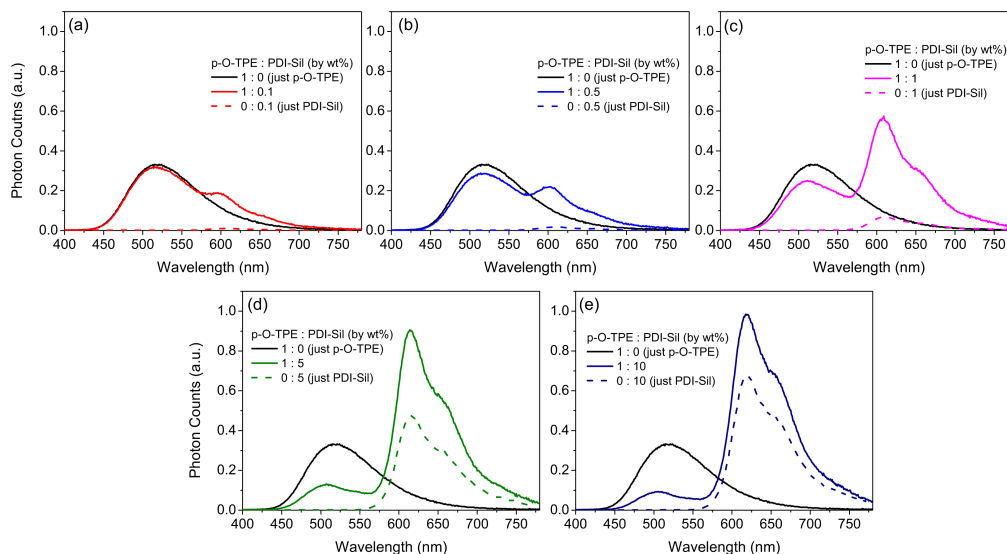

**Figure S4.** (a)-(e) Emission spectra ( $\lambda_{em} = 370$  nm) of p-O-TPE-dU(600) (solid black), p-O-TPE-PDI-Sil-dU(600) (solid coloured) and PDI-Sil-dU(600) (dash coloured) with varying concentration ratios between p-O-TPE and PDI-Sil. A concentration ratio of 1 : 1 represents 0.005 wt% of p-O-TPE and 0.005 wt% of PDI-Sil.

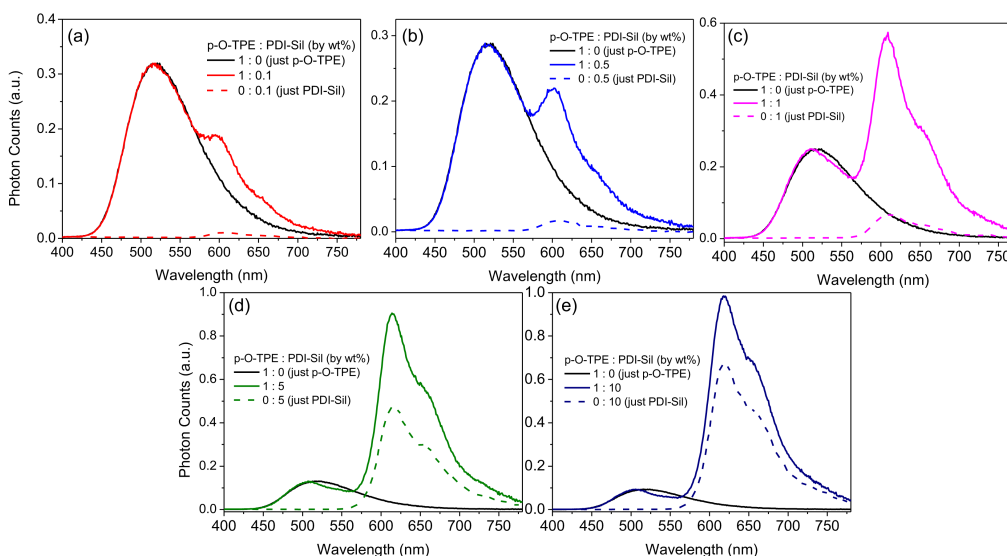

**Figure S5.** (a)-(e) Emission spectra ( $\lambda_{em} = 370$  nm) of p-O-TPE-dU(600) (solid black, normalized by the peak intensity of p-O-TPE emission in p-O-TPE-PDI-Sil-dU(600)), p-O-TPE-PDI-Sil-dU(600) (solid coloured) and PDI-Sil-dU(600) (dash coloured) with varying concentration ratios between p-O-TPE and PDI-Sil. A concentration ratio of 1 : 1 represents 0.005 wt% of p-O-TPE and 0.005 wt% of PDI-Sil.

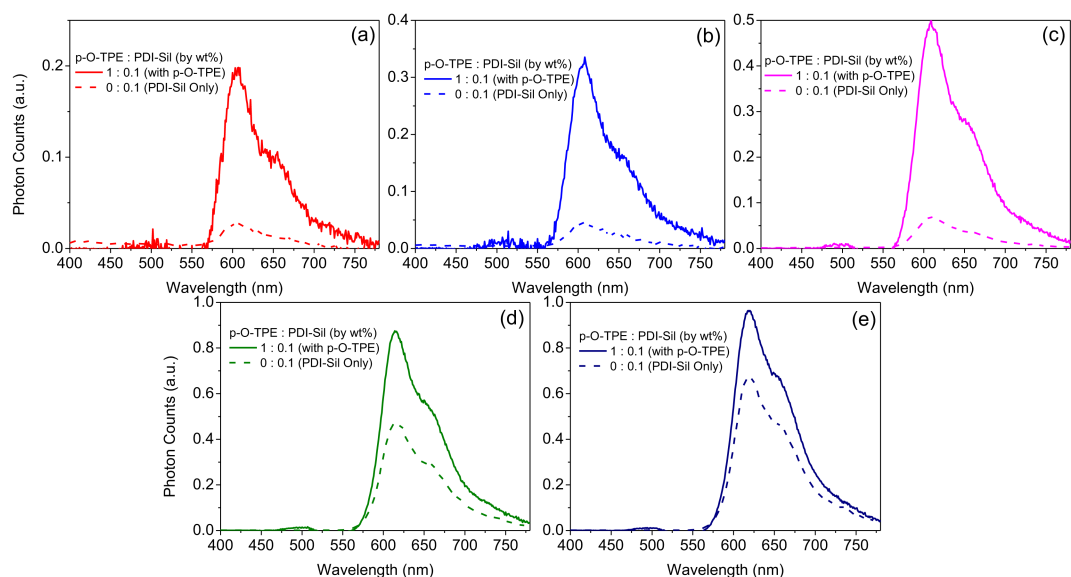

**Figure S6.** (a)–(e) Emission spectra ( $\lambda_{em} = 370$  nm) of PDI-Sil in p-O-TPE-PDI-Sil-dU(600) (solid) and PDI-Sil-dU(600) (dash) with varying concentration ratios between p-O-TPE and PDI-Sil. A concentration ratio of 1 : 1 represents 0.005 wt% of p-O-TPE and 0.005 wt% of PDI-Sil.

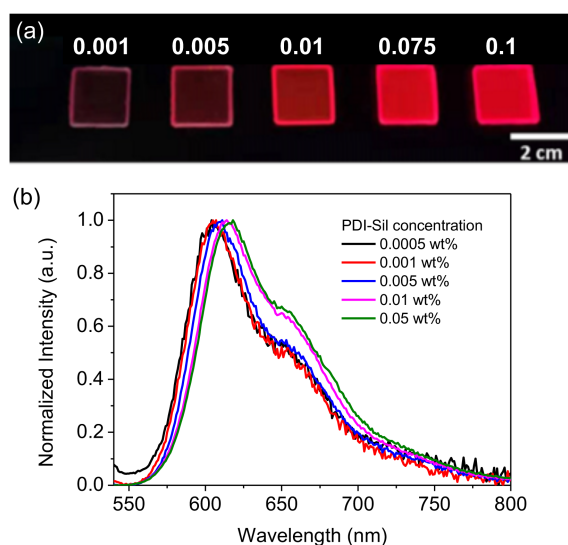

**Figure S7.** Optical properties of PDI-Sil-dU(600) ureasils. (a) Photograph of PDI-Sil-dU(600) samples doped with varying concentration of PDI-Sil under UV illumination (365 nm). The value above each sample represents the concentration (wt%) of PDI-Sil in dU(600). (b) Normalized emission spectra ( $\lambda_{ex} = 530$  nm) of PDI-Sil-dU(600) samples with varying concentrations of PDI-Sil.

### 3.3 Integrated photon counts of edge emission

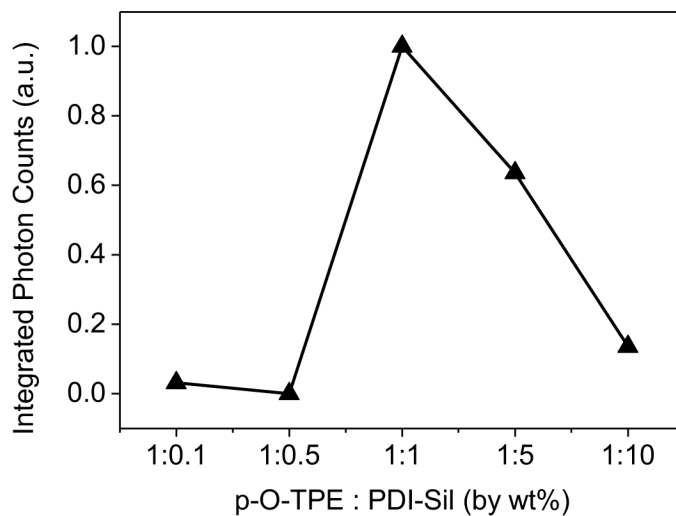

**Figure S8.** Number of photons emitted from the edge of p-O-TPE-PDI-Sil-dU(600) samples as a function of p-O-TPE : PDI-Sil concentration ratio in arbitrary units.

### 4. UV/Vis transmittance and absorption spectra of large LSCs

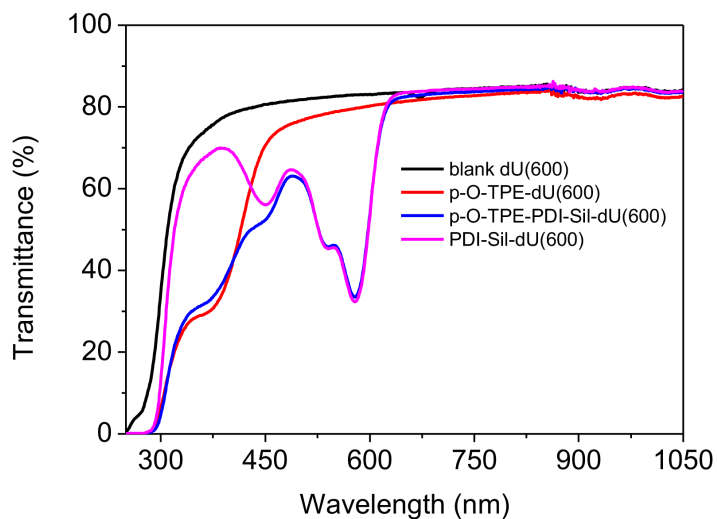

**Figure S9.** UV/Vis transmittance spectra of dU(600), p-O-TPE-dU(600), PDI-Sil-dU(600) and p-O-TPE-PDI-Sil-dU(600) samples (4.5 cm × 4.5 cm × 0.3 cm).

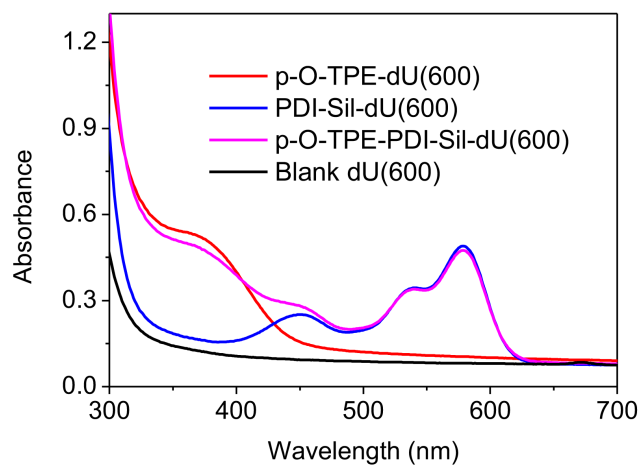

**Figure S10.** UV/Vis absorption spectra of dU(600), p-O-TPE-dU(600), PDI-Sil-dU(600) and p-O-TPE-PDI-Sil-dU(600) (4.5 cm × 4.5 cm × 0.3 cm).



## 5. Literature comparison of LSC efficiencies

**Table S1.** Performance metrics of the p-O-TPE-PDI-Sil-LSC reported in this work compared to some examples from the recent literature.

| Type                                                                                  | Dimensions                | Geometric Gain <sup>a</sup> | Light Source           | $\eta_{int}^b$ |
|---------------------------------------------------------------------------------------|---------------------------|-----------------------------|------------------------|----------------|
| This work                                                                             | 4.5 cm × 4.5 cm × 0.3 cm  | 3.8                         | AM1.5G Solar simulator | 20.0%          |
| CdSe/ZnS core/shell-Alexa Fluor 546 dye <sup>2</sup>                                  | 4 cm × 4 cm × 0.27 cm     | 3.7                         | AM1.5G Solar simulator | 19.8%          |
| Silica-coated CdSe/CdZn <sub>x</sub> S <sub>1-x</sub> core/alloyed shell <sup>3</sup> | 10 cm × 10 cm × 0.16 cm   | 15.6                        | Sunlight               | 21.0%          |
| Perovskite nanoplatelets <sup>4</sup>                                                 | 10 cm × 10 cm × 0.2 cm    | 12.5                        | Sunlight               | 26.0%          |
| PbS/CdS core/shell <sup>5</sup>                                                       | 10 cm × 10 cm × 0.2 cm    | 12.5                        | Solar simulator        | 4.5%           |
| CuInSeS <sub>2</sub> In/ZnS core/shell <sup>6</sup>                                   | 10 cm × 10 cm × 0.3 cm    | 8.3                         | Solar simulator        | 16.7%          |
| Silicon quantum dots <sup>7</sup>                                                     | 12 cm × 12 cm × 0.26 cm   | 11.5                        | Solar simulator        | 30.0%          |
| CdSe/CdS core/shell <sup>8</sup>                                                      | 21.5 cm × 1.3 cm × 0.5 cm | 1.2                         | Solar simulator        | 10.2%          |

<sup>a</sup> The geometric gain ( $G$ ) of an LSC is defined by:

$$G = \frac{A_{top}}{A_{edge}} \quad (S1)$$

where  $A_{top}$  and  $A_{edge}$  are the areas of the top surface and edges of the LSC, respectively.

<sup>b</sup> The internal photon efficiency ( $\eta_{int}$ ) of an LSC is defined by the following equation:

$$\eta_{int} = \frac{N_{ph-out}}{N_{ph-abs}} \quad (S2)$$

where  $N_{ph-out}$  is the total number of edge-emitted photons summed over four edges of the LSC and  $N_{ph-abs}$  is the total number of photons absorbed by the LSC.

## 6. References

- [1] Baysec, S.; Preis, E.; Allard, S.; Scherf, U., Very High Solid State Photoluminescence Quantum Yields of Poly (tetraphenylethylene) Derivatives. *Macromol. Rapid Commun.* **2016**, 37, 1802-1806.
- [2] Tummeltshammer, C.; Portnoi, M.; Mitchell, S.A.; Lee, A-T.; Kenyon, A. J.; Tabor, A. B.; Papakonstantinou, I., On the ability of Förster resonance energy transfer to enhance luminescent solar concentrator efficiency. *Nano Energy.* **2017**, 32, 263-270.
- [3] Li, H.; Wu, K.; Lim, J.; Song, H. J.; Klimov, V. I., Doctor-blade deposition of quantum dots onto standard window glass for low-loss large-area luminescent solar concentrators. *Nat. Energy.* **2016**, 1, 1-9.
- [4] Wei, M.; Arquer, F. P. G. D.; Walters G, Yang, Z.; Quan, L. N.; Kim, Y.; Sabatini, R.; Quintero-Bermudez, R.; Gao, L.; Fan, J. Z.; Fan, F.; Gold-Parker, A.; Toney, M. F.; Sargent, E. H., Ultrafast narrowband exciton routing within layered perovskite nanoplatelets enables low-loss luminescent solar concentrators. *Nat. Energy.* **2019**, 4, 197-205.
- [5] Zhou, Y.; Benetti, D.; Fan, Z.; Zhao, H.; Ma, D.; Govorov, A. O.; Vomiero, A.; Rosei, F., Near Infrared, Highly Efficient Luminescent Solar Concentrators. *Adv. Energy Mater.* **2016**, 6, 1–8.
- [6] Meinardi, F.; McDaniel, H.; Carulli, F.; Colombo, A.; Velizhanin, K. A.; Makarov, N. S.; Simonutti, R.; Klimov, V. I.; Brovelli, S., Highly efficient large-area colourless luminescent solar concentrators using heavy-metal-free colloidal quantum dots. *Nat. Nanotechnol.* **2015**, 10, 878–885.
- [7] Meinardi, F.; Ehrenberg, S.; Dharmo, L.; Carulli, F.; Mauri, M.; Bruni, F.; Simonutti, R.; Kortshagen, U.; Brovelli, S., Highly efficient luminescent solar concentrators based on earth-Abundant indirect-bandgap silicon quantum dots. *Nat. Photonics* **2017**, 11, 177–185.
- [8] Meinardi, F.; Colombo, A.; Velizhanin, K. A.; Simonutti, R.; Lorenzon, M.; Beverina, L.; Viswanatha, R.; Klimov, V. I.; Brovelli, S., Large-area luminescent solar concentrators based on Stokes-shift-engineered nanocrystals in a mass-polymerized PMMA matrix. *Nat. Photonics.* **2014**, 8, 392-399.
